# Supplementary material
Source: Royal Society of Chemistry journal article supplement (doi:10.1039/d5tb02428e)

### Original data of western blot assay of Figure 2F

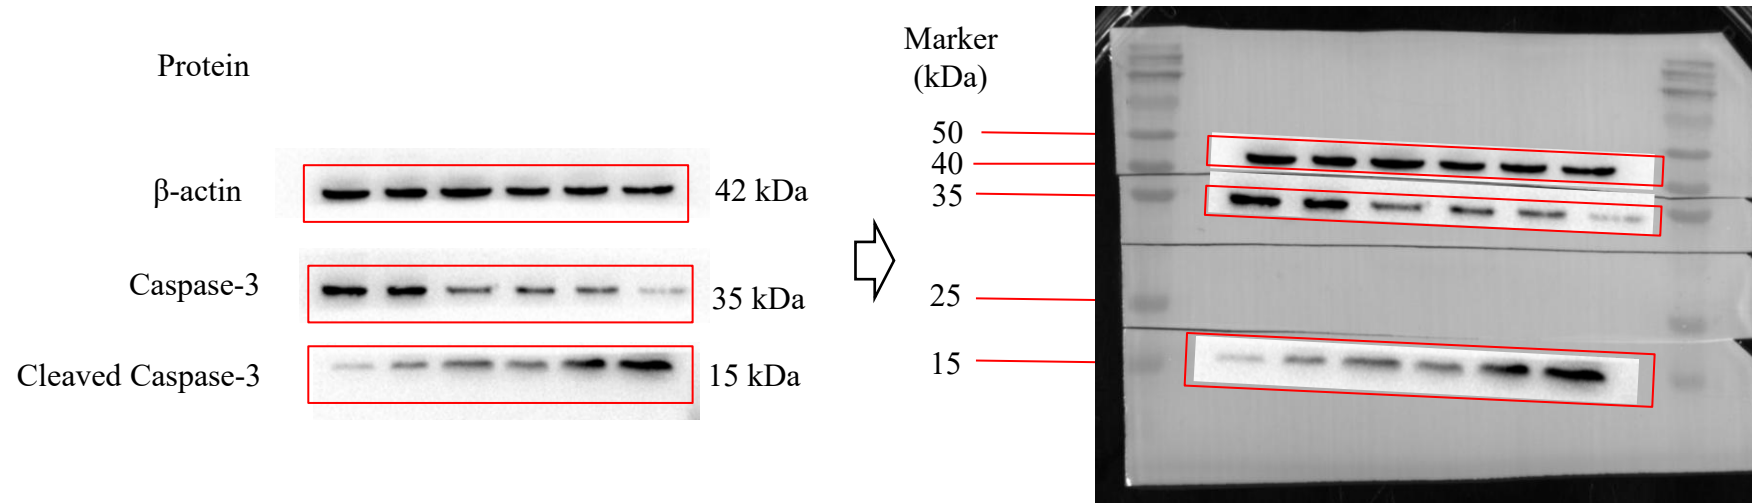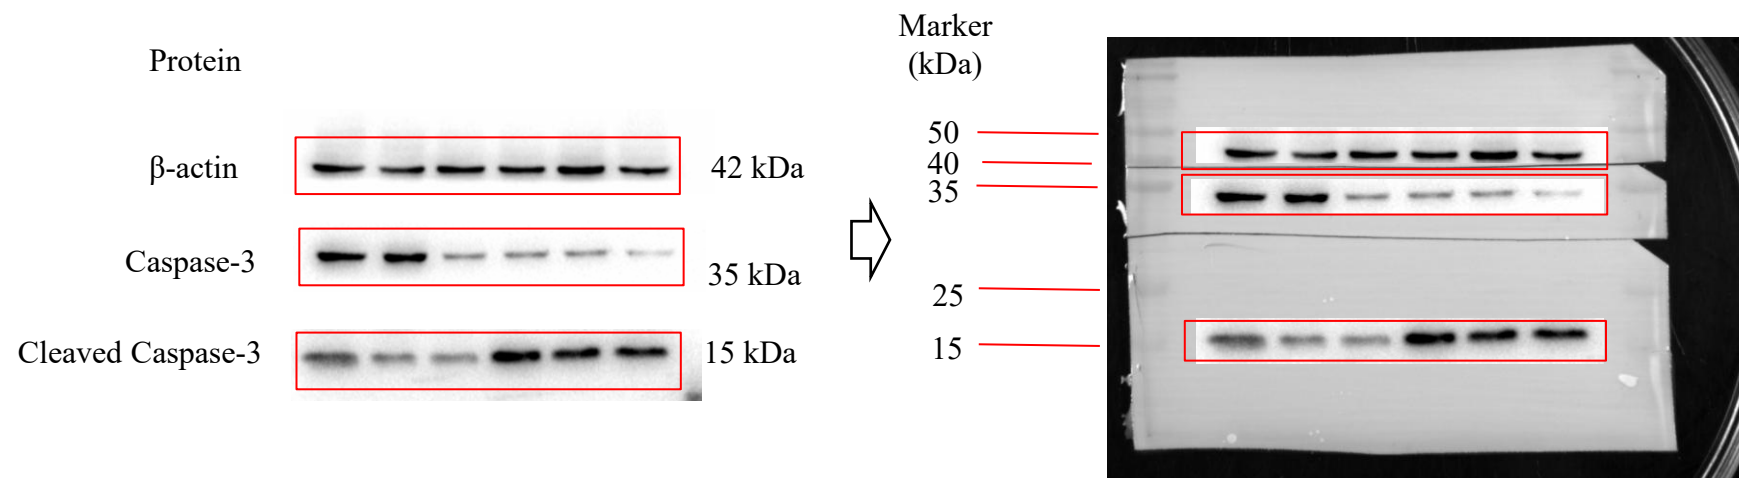

# Original data of western blot assay of Figure 2F

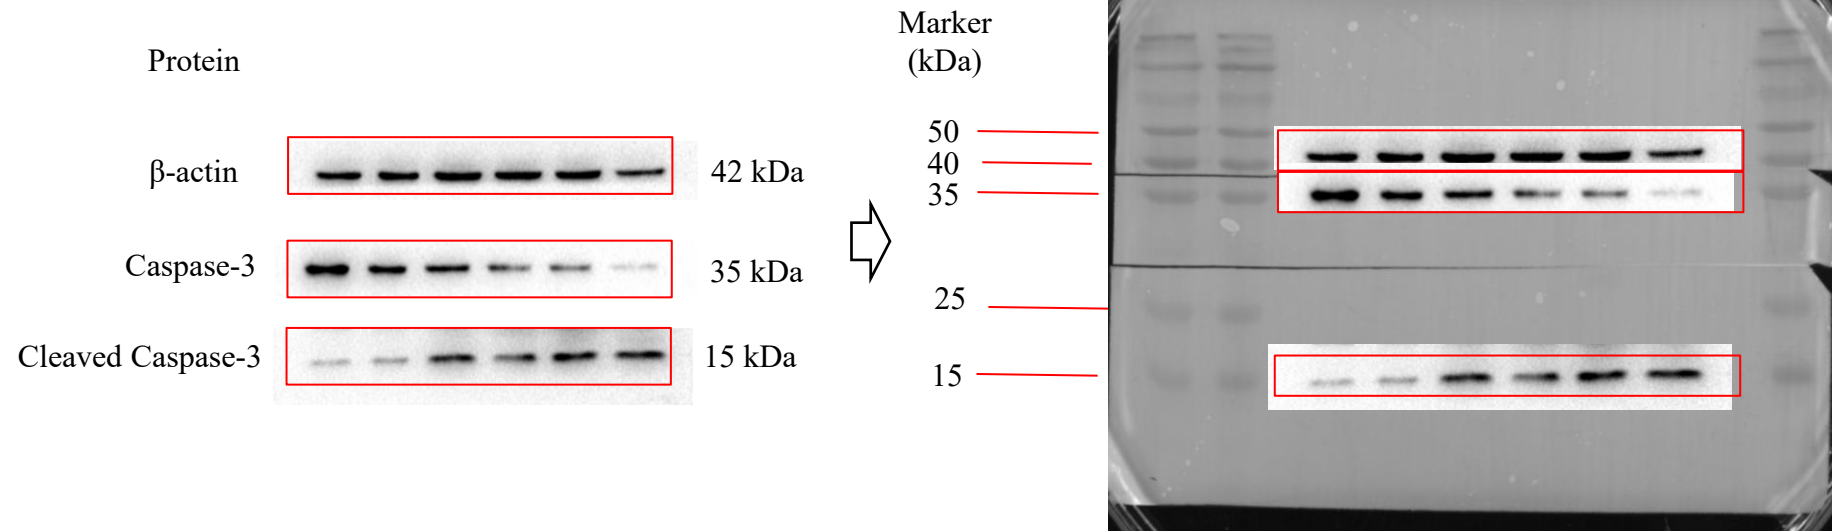

# Original data of western blot assay of Figure 4H

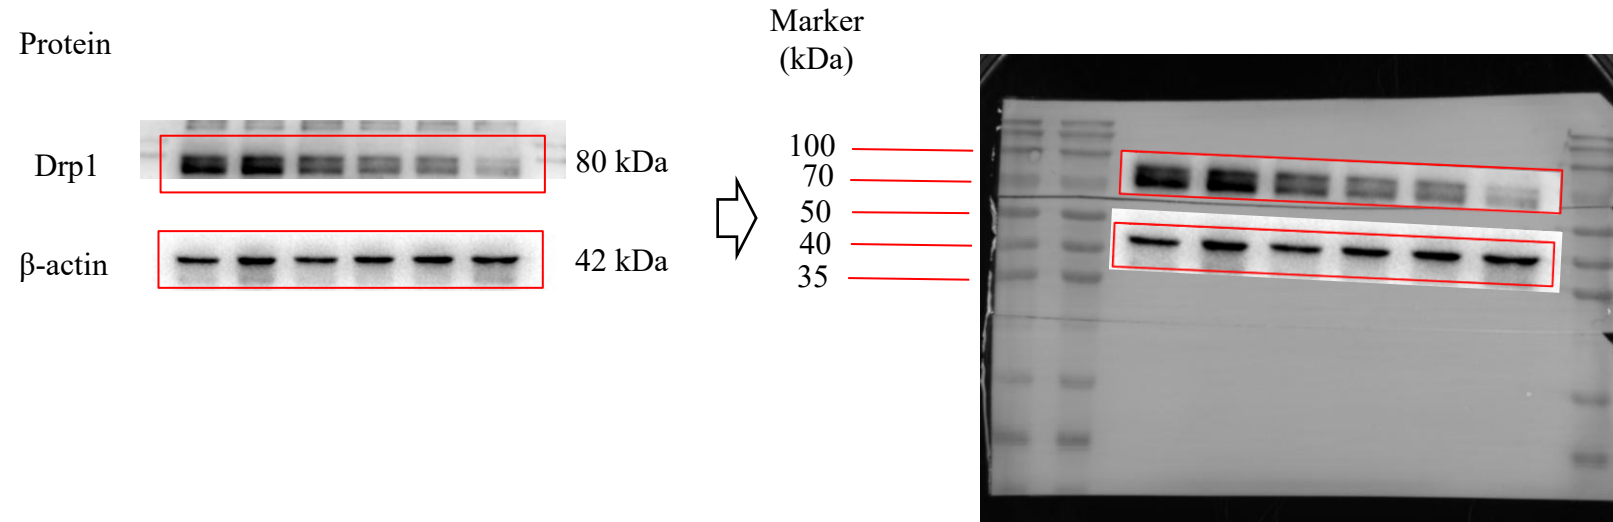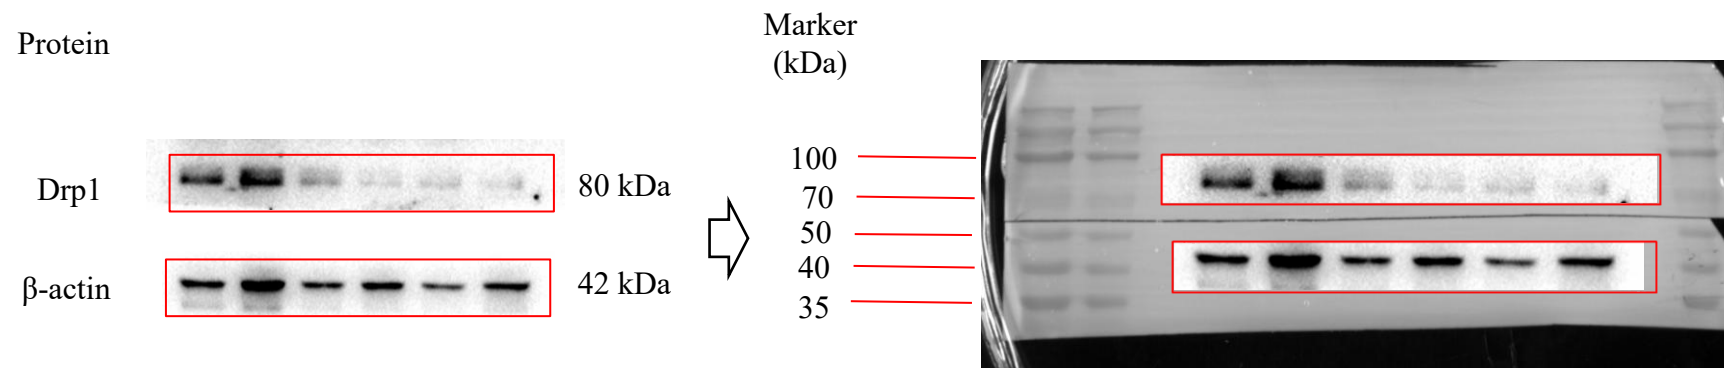

# Original data of western blot assay of Figure 4H

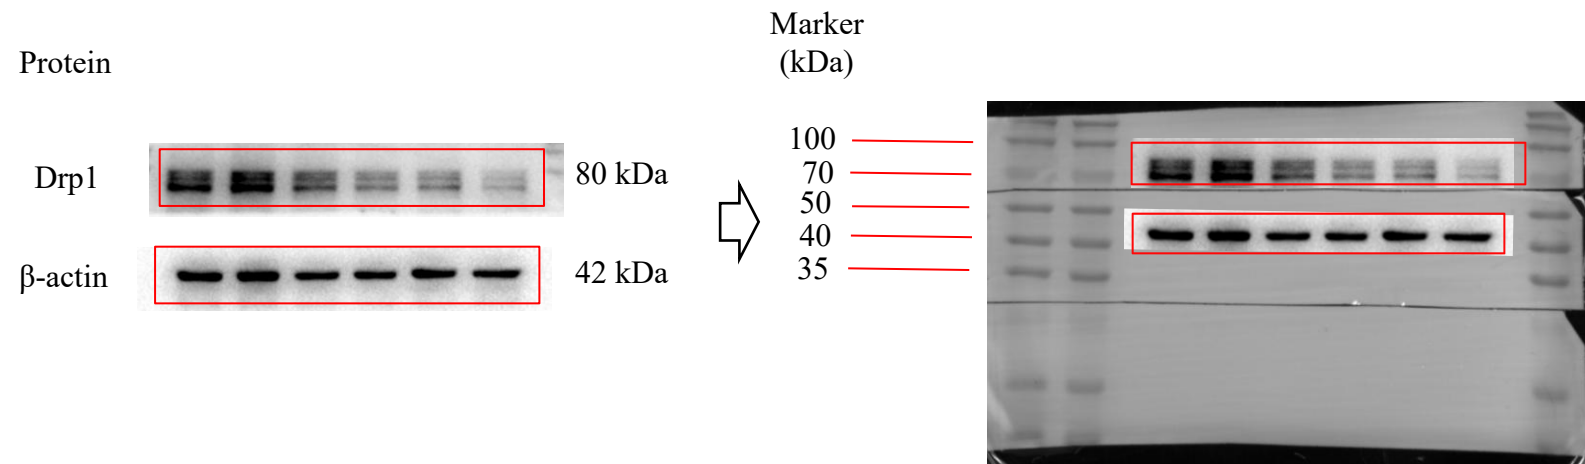

Original data of western blot assay of Figure 7G

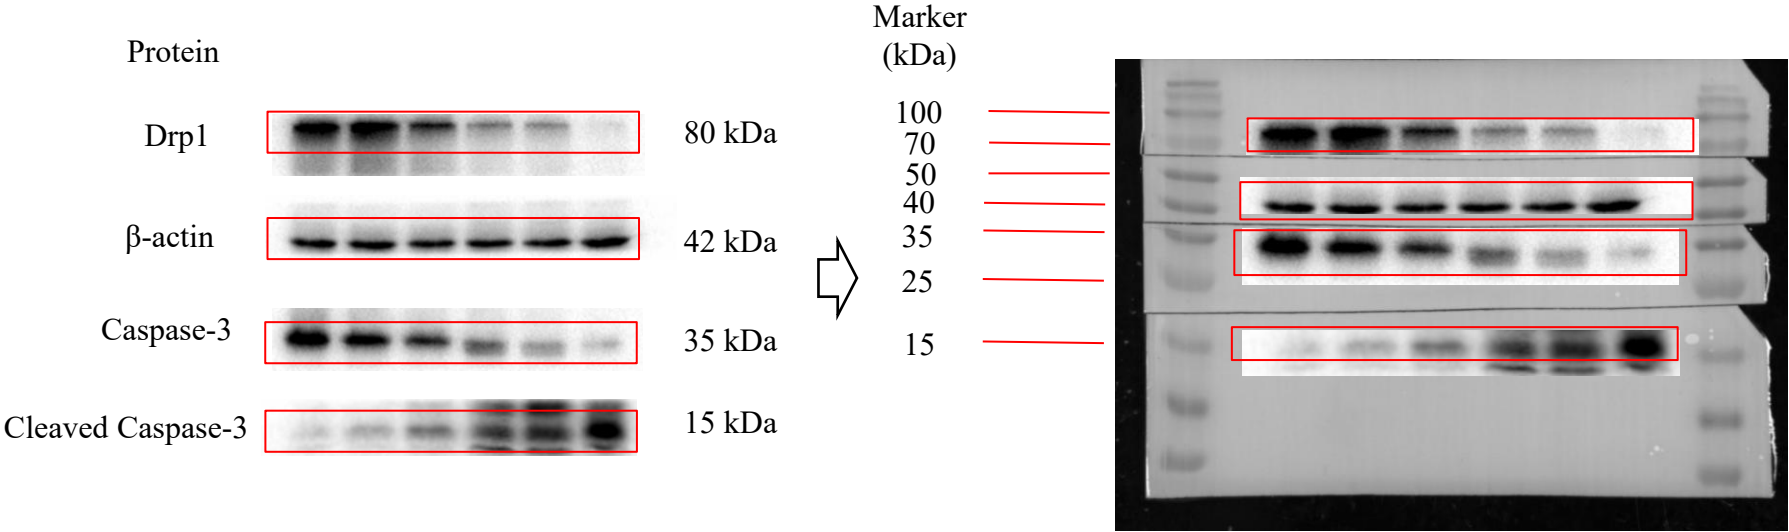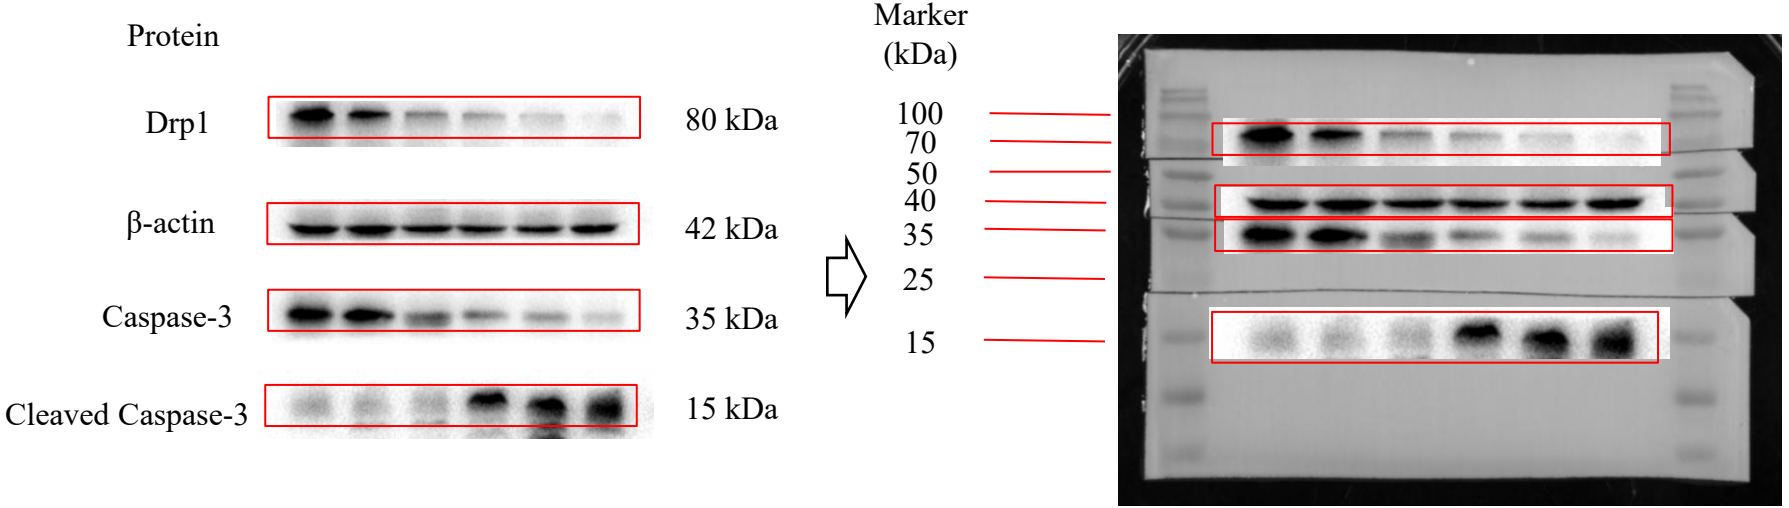

# Original data of western blot assay of Figure 7G

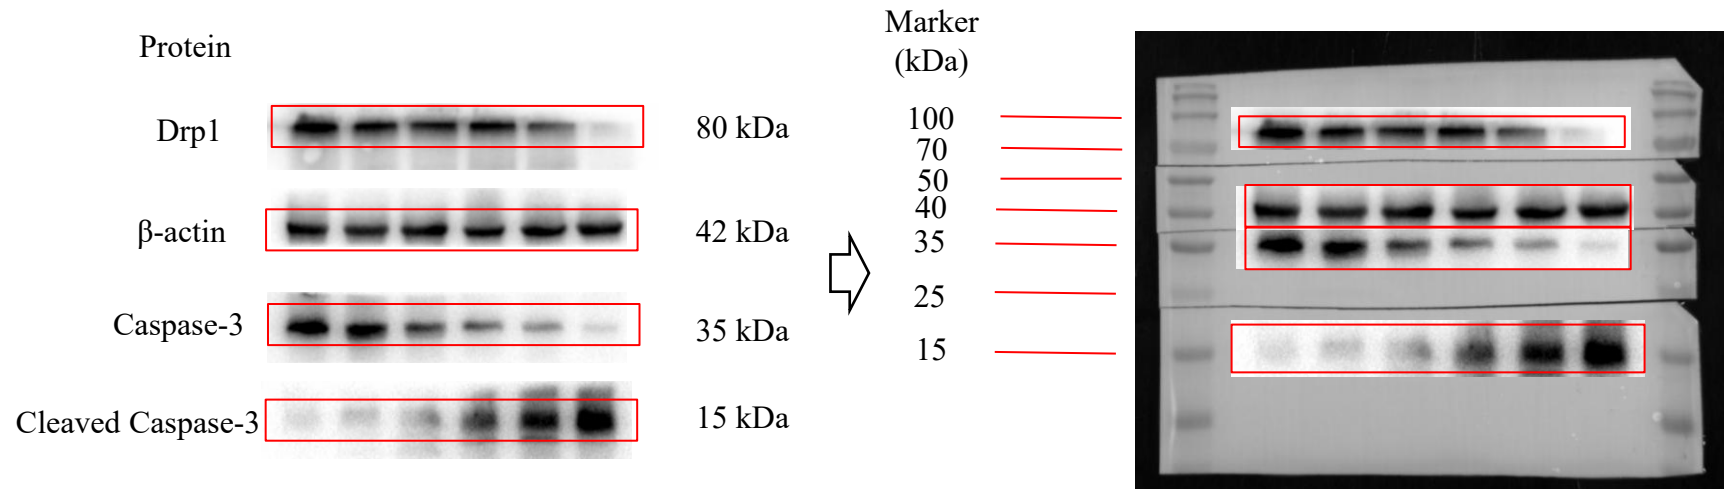

Supplement: d5tb02428e2.pdf [file d5tb02428e2.pdf]
